# Supplementary material
Source: publisher site journal article supplement (https://www.degruyter.com/publication/isbn/9783110403169/downloadAsset/9783110403169_Stolz-KPL-5_Contents.pdf)
Supplement: Supplementary file 1 [file 9783110403169_Stolz-KPL-5_Contents.pdf]

# Contents

Preface — vii

## Part 1: General aspects

Thomas Stolz and Ingo H. Warnke

**From missionary linguistics to colonial linguistics — 3**

## Part 2: Africa

Clara Mortamet and Céline Amourette

**Missionary descriptions in a colonial context — 29**

Susanne Hackmack

**Case in selected grammars of Swahili — 51**

Susana Castillo-Rodríguez

**The first missionary linguistics in Fernando Po — 75**

Martina Anissa Strommer

**Imagined communities, invented tribe? — 107**

Stefan Castelli

**Pre-colonial language policy of the Rhenish Mission Society perceived as the type of Gustav Warneck's mission doctrine? — 129**

Cécile Van den Avenne

**Reducing languages to writing — 155**

## Part 3: America

Catherine Fountain

**Transculturation, assimilation, and appropriation in the missionary representation of Nahuatl — 177**

Micaela Carrera de la Red and Francisco José Zamora Salamanca  
**Connections between the scientific discourse and the frontier missions in the surroundings of the Viceroyalty of New Granada — 199**

Astrid Alexander-Bakkerus  
**Examples of transcultural processes in two colonial linguistic documents on Jebero (Peru) — 231**

**Index of Persons (including authors) — 255**

**Index of Languages — 261**

**Index of Subjects — 263**
